# Supplementary material
Source: PubMed Central journal article supplement (PMC3208289)
Supplement: supp_blood-2011-05-355107_Document1.pdf [file supp_blood-2011-05-355107_Document1.pdf]

Table S1. Validation of EKLF occupancy

| Site           | Chromosomal location     | Forward primer         | Reverse primer        | Genomic location          | Fold increase mean | SD          | P               |
|----------------|--------------------------|------------------------|-----------------------|---------------------------|--------------------|-------------|-----------------|
| Neg site 1     | chr4:135660984-135661108 | GGAAGCCTGGACTCTGGAA    | CTGGGGAATCCAAACCAAC   | intragenic                | 1.36               | 0.25        | 0.37            |
| <b>Peak 2</b>  | chr4:135696994-135697142 | CATTTTCAGCCTGGGAGCA    | TCGGGGTTGGATAGGAGATT  | 5' distal <i>Id3</i>      | <b>1.86</b>        | <b>0.01</b> | <b>0.0002</b>   |
| <b>Peak 3</b>  | chr4:135700678-135700768 | CGGAGTTATCAGCTGGAGGTAG | CGAGGGAGCCGTCAGTTT    | intragenic <i>Id3</i>     | <b>5.65</b>        | <b>2.13</b> | <b>4.6E-05</b>  |
| <b>Peak 4</b>  | chr4:135742664-135742767 | TGCCTCATTGTTCTCTTCC    | GCAGGACTGTCTGGCTCCT   | 5' proximal <i>E2f2</i>   | <b>3.14</b>        | <b>0.19</b> | <b>2.9E-06</b>  |
| Neg site 5     | chr4:135750036-135750121 | CAGCTCATGACGGGATAGG    | GACCACAGGAACCCTGGA    | intragenic <i>E2f2</i>    | 1.37               | 0.24        | 0.34            |
| Neg site 6     | chr4:135771402-135771508 | AGGGGTCAGAATCACACCAA   | AACTGGCACCAAGACTGCTC  | 5' proximal <i>Ddef1</i>  | 1.31               | 0.10        | 0.007           |
| <b>Peak 7</b>  | chr4:135794364-135794519 | TCGCTGAGGTGAAGAGCAG    | AGCCTCCATCCCAGAGTCC   | intragenic <i>Ddef1</i>   | <b>1.97</b>        | <b>0.27</b> | <b>0.0005</b>   |
| <b>Peak 8</b>  | chr2:154377695-154377917 | CCAGTTATCCGCCCTGAA     | AATGAAGGCAGCCTGTGG    | intragenic <i>Apba2bp</i> | <b>7.41</b>        | <b>0.38</b> | <b>0.0001</b>   |
| Neg site 9     | chr8:24135379-24135625   | TCCCTGCAGTCTAGGTGGTT   | GCCACTCTTCTGGTTCAA    | 5' proximal <i>Ank1</i>   | 1.19               | 0.11        | 0.41            |
| <b>Peak 10</b> | chr8:24144641-24145055   | ACACCCAGGTTCCAAAGACA   | GACTAGACAGCAGGTAAAGG  | 5' proximal <i>Ank1</i>   | <b>5.90</b>        | <b>2.41</b> | <b>5.36E-05</b> |
| Neg site 11    | chr8:24160706-24160833   | ACTCGGTCACCTTTGGTCA    | TCATTGCAGGGTAATCCCTAA | 5' proximal <i>Ank1</i>   | 1.00               | 0.28        | 0.67            |
| Neg site 12    | chr8:24220968-24221063   | AGGGCCCAGAGCTGACTAA    | ATGCAGGATGAGCACAAACA  | intragenic <i>Ank1</i>    | 1.19               | 0.01        | 0.54            |
| <b>Peak 13</b> | chr8:24246144-24246247   | GTGCGCTTCAGGAATACGAG   | TAGGTTCTTGCCAGCTTTG   | intragenic <i>Ank1</i>    | <b>2.70</b>        | <b>0.06</b> | <b>1.11E-06</b> |
| Neg site 14    | chr8:24268170-24268278   | GGAGAACGAGGACGATGAGT   | AGGCTGAGCACGGAGAAAG   | intragenic <i>Nkx6-3</i>  | 1.10               | 0.42        | 0.93            |
| Neg site 15    | chr8:24302930-24303058   | CACTTCACTACACTGGCTGCTC | TTCAGGAACCTGCATTGGTAA | intragenic <i>Agpat6</i>  | 0.91               | 0.42        | 0.77            |

|                |                           |                         |                        |                            |                             |                     |                      |
|----------------|---------------------------|-------------------------|------------------------|----------------------------|-----------------------------|---------------------|----------------------|
| <b>Peak 16</b> | chr8:24318333-24318468    | GATCTAACGCCGGGTTCTC     | GACCGGTTTCTCTCCTCC TC  | intragenic <i>Agpat6</i>   | <b>3.539</b>                | <b>0.48</b>         | <b>2.32E-05</b>      |
| Neg site 17    | chr12:77636701-77636792   | GACTGGAGGGTGCCACA A     | AGACAACACCTCCCATCA CC  | 5' proximal <i>Plekhg3</i> | 1.19                        | 0.03                | 0.82                 |
| <b>Peak 18</b> | chr12:77661130-77661200   | GCTTGACCCTCCATCTGT CT   | CTCCTGGCTGCCATCTTG     | 5' proximal <i>Plekhg3</i> | <b>4.21</b>                 | <b>2.08</b>         | <b>0.0189</b>        |
| <b>Peak 19</b> | chr12:77699511-77699629   | GGACATGAGAACCAGTA CCACA | CCTGGAGAAGCCCACCA C    | intragenic <i>Spnb1</i>    | <b>3.00</b>                 | <b>0.18</b>         | <b>2.94E-06</b>      |
| <b>Peak 20</b> | chr12:77704548-77704692   | AATAGCGGTGCAGGTCTG TAG  | CACCATCGCTGAGTGGA AG   | intragenic <i>Spnb1</i>    | <b>3.67</b>                 | <b>0.55</b>         | <b>4.12E-06</b>      |
| <b>Peak 21</b> | chr12:77710011-77710085   | CCCCCAGATCCCTTCTAC AC   | GGGCAAGGATCTCACCA CT   | intragenic <i>Spnb1</i>    | <b>2.49</b>                 | <b>0.04</b>         | <b>4.49E-06</b>      |
| <b>Peak 22</b> | chr12:77723872-77723955   | CTACAGAACGGGGTGTG AGG   | ACCCTGGCACTGCAGAA A    | intragenic <i>Spnb1</i>    | <b>1.97</b>                 | <b>0.27</b>         | <b>0.0005</b>        |
| <b>Peak 23</b> | chr12:77841810-77841863   | GCGATCAAGAGATCATCC AC   | AAAAATTCCCCACCCTG TT   | 5' distal <i>Spnb1</i>     | <b>3.07</b>                 | <b>0.56</b>         | <b>1.86E-06</b>      |
| <b>Peak 24</b> | chr12:77852146-77852238   | CAGGTCCACCCAGTGCTT AC   | TCCATCGTCTCAAGGAAA GTG | intergenic                 | <b>2.23</b>                 | <b>0.07</b>         | <b>0.0004</b>        |
| <b>Peak 25</b> | chr11:102155504-102155607 | AAGCGGGAAGCAGCAAT AC    | TGGGTTGGACATCTTTGG AC  | intragenic <i>Atxn713</i>  | <b>1.83</b>                 | <b>0.30</b>         | <b>0.0004</b>        |
| <b>Peak 26</b> | chr7:111009508-111009585  | GGGTGTGTGGCCAGATG TTT   | CACCTTCCCTGTGGACTT CCT | beta-globin HS2            | <b>1.76</b>                 | <b>0.20</b>         | <b>2.62E-05</b>      |
| <b>Peak 27</b> | chr7:110962210-110962378  | GTTAGTGCCTGCTGGAAA GC   | GCACCTGACTGATGCTG AGA  | 5' proximal <i>Hbb-b1</i>  | <b>10.89</b>                | <b>0.05</b>         | <b>5.79E-08</b>      |
| <b>Peak 28</b> | chr7:110961078-110961319  | ATGCCCAAAGGTCTTCAT CA   | GGTTCTTCCATCTTCCCA CA  | intragenic <i>Hbb-b1</i>   | <b>1.44</b>                 | <b>0.01</b>         | <b>0.0007</b>        |
| <b>Peak 29</b> | chr2:102741149-102741324  | CGGGCATCCAAGAGTAC AGT   | GGGATTTGGGGCTATGC TAT  | 5' proximal <i>Cd44</i>    | <b>10.5 (P)</b><br>1.03 (E) | <b>2.53</b><br>0.65 | <b>0.001</b><br>0.47 |

Table S2. EKLF motif analysis

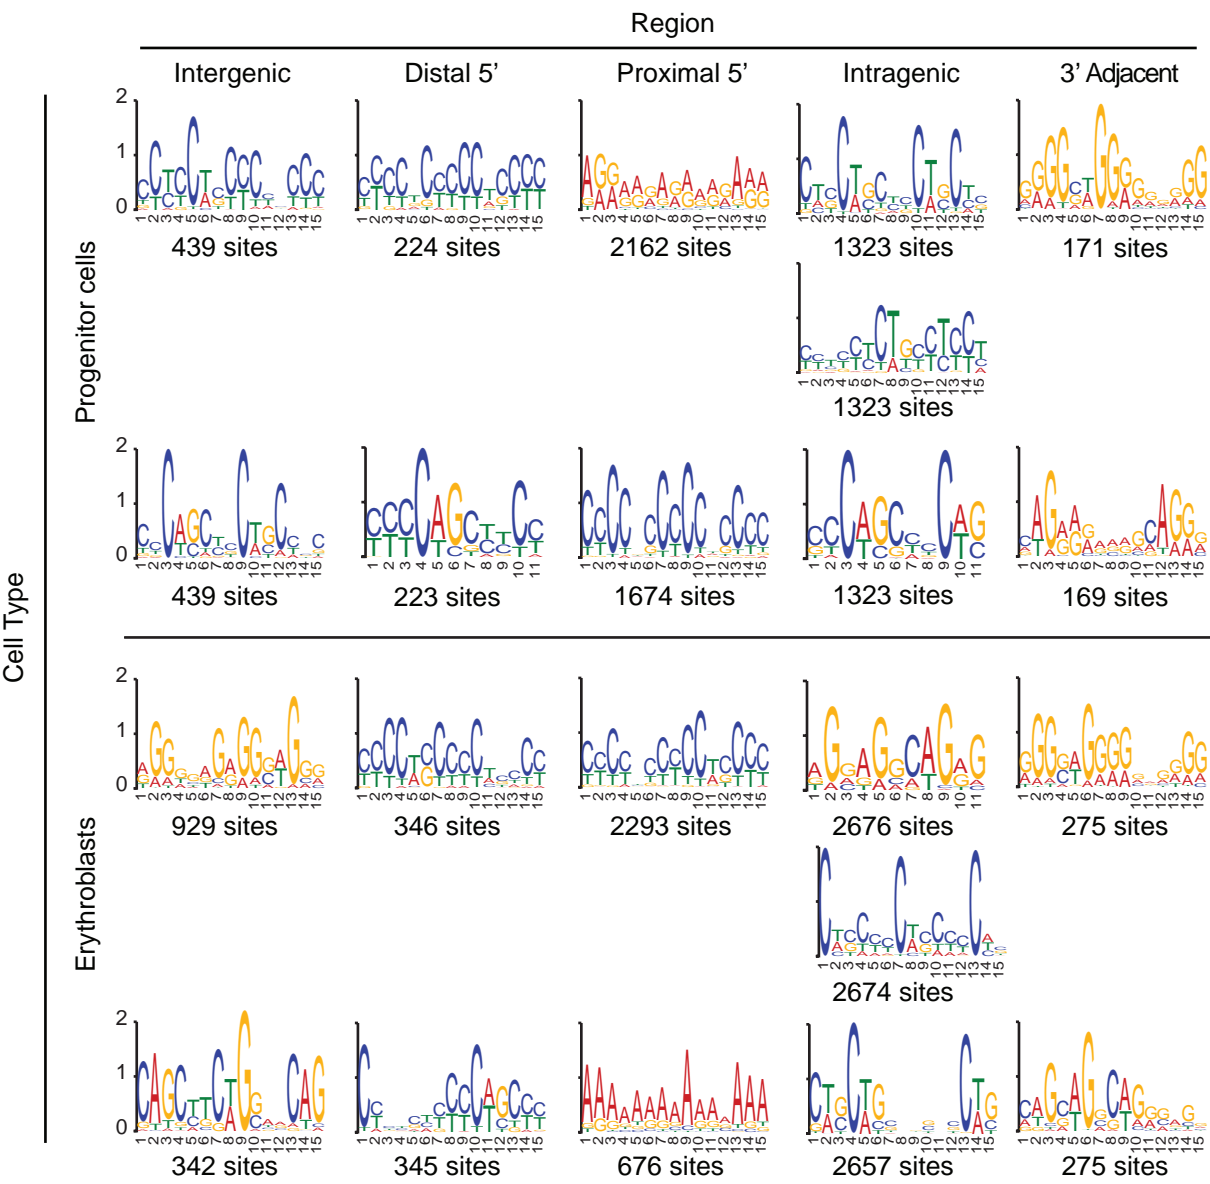

Table S3. Differentially expressed EKLf Target genes

Those genes that are occupied by EKLf only in progenitor cells or erythroblasts are referred to as Pro only and Ery only respectively. Genes that are occupied by EKLf in both progenitor cells and erythroblasts are referred to as Common. mRNA levels can change from high levels in Pro to lower levels in ERY (Hi>Lo) or vice versa. The number of genes with that particular expression pattern is indicated.

| <b>PRO only<br/>Hi -&gt; Lo (190)</b> | <b>PRO only<br/>Lo -&gt; Hi (26)</b> | <b>ERY only<br/>Hi -&gt; Lo (692)</b> | <b>ERY only<br/>Lo -&gt; Hi (246)</b> | <b>Common<br/>Lo -&gt; Hi (27)</b> | <b>Common<br/>Hi -&gt; Lo (70)</b> |
|---------------------------------------|--------------------------------------|---------------------------------------|---------------------------------------|------------------------------------|------------------------------------|
| 0910001L09Rik                         | Abhd4                                | 0610009D07Rik                         | 1300017J02Rik                         | Abca7                              | 0610007L01Rik                      |
| 1110038B12Rik                         | Acbd5                                | 1110004E09Rik                         | 1810058I24Rik                         | Acbd4                              | 1300001I01Rik                      |
| 1110058L19Rik                         | Apoa1                                | 1110004F10Rik                         | 2010011I20Rik                         | Ank1                               | 2310011J03Rik                      |
| 1810022K09Rik                         | Arfgap3                              | 1110020P15Rik                         | 2310035K24Rik                         | Arrdc2                             | 2410001C21Rik                      |
| 2510012J08Rik                         | Btrc                                 | 1500001M20Rik                         | 2810453I06Rik                         | Brpf3                              | 3110082I17Rik                      |
| 2810002N01Rik                         | Cdkn2c                               | 1500011K16Rik                         | 4833442J19Rik                         | Ehbp11                             | Adrbk1                             |
| Abce1                                 | Chd2                                 | 1700034H14Rik                         | 4930523C07Rik                         | Epb42                              | Aes                                |
| Acat1                                 | Cldn13                               | 1810006K21Rik                         | 5730469M10Rik                         | Fbxl15                             | Akt1                               |
| Acly                                  | Creg1                                | 1810009A15Rik                         | 5830415F09Rik                         | Galnt10                            | Ankrd27                            |
| Adi1                                  | Depdc1b                              | 1810035L17Rik                         | AA986860                              | Gmpr                               | Ankrd52                            |
| Adprh                                 | Dlk1                                 | 1810046J19Rik                         | AI317395                              | Gpr146                             | Ap2a1                              |
| Akr1b3                                | Dnajb6                               | 2010107E04Rik                         | Abcb10                                | Hipk1                              | Arrb2                              |
| Aldh2                                 | Dnase1l1                             | 2310008H09Rik                         | Abtb1                                 | Hmox1                              | Asrgl1                             |
| Aldoa                                 | Eral1                                | 2310016M24Rik                         | Ache                                  | Itsn1                              | Bop1                               |
| Arf3                                  | Gabbr2                               | 2410016O06Rik                         | Acot11                                | Mgl1                               | Cad                                |
| Asna1                                 | Ift140                               | 2500003M10Rik                         | Acp5                                  | Mical3                             | Calm3                              |
| Atp5g2                                | Klhl25                               | 2610002D18Rik                         | Adipor1                               | Mpp2                               | Capzb                              |
| Atxn10                                | Lgmn                                 | 2610027L16Rik                         | Adra2b                                | Mxi1                               | Ccnd2                              |
| Bat2                                  | Ppox                                 | 2610301G19Rik                         | Adrb2                                 | Pcx                                | Cdk2ap1                            |
| Bst2                                  | Sept1                                | 2610528E23Rik                         | Aff1                                  | Rfx2                               | Chd4                               |
| Ccdc72                                | Sh3tc2                               | 2700060E02Rik                         | Akap13                                | Sema4b                             | Coq7                               |
| Cct3                                  | Snx15                                | 2700094K13Rik                         | Akap7                                 | Sertad3                            | Coro1c                             |
| Cct5                                  | St3gal1                              | 2810432D09Rik                         | Alas2                                 | Slc2a4                             | Ctnnb1                             |
| Cd44                                  | Tnfrsf14                             | 2900010J23Rik                         | Amigo3                                | Slc9a8                             | Dazap1                             |
| Cdc37                                 | Trak2                                | 2900010M23Rik                         | Ankrd43                               | Ston2                              | Dcakd                              |
| Cdc42se1                              | Zfp217                               | 2900097C17Rik                         | Ankrd9                                | Tcf7l2                             | Dgkz                               |
| Cdca7                                 |                                      | 5730437N04Rik                         | Arhgef12                              | Tmod1                              | Drap1                              |
| Cdca7l                                |                                      | 9530068E07Rik                         | Arid3b                                |                                    | E130309D02Rik                      |
| Cebpz                                 |                                      | AU022870                              | Asb1                                  |                                    | Ehmt2                              |
| Cherp                                 |                                      | Aaas                                  | Atg4d                                 |                                    | Eif4ebp1                           |
| Clic1                                 |                                      | Aarsd1                                | Atg9a                                 |                                    | Galnt2                             |
| Clint1                                |                                      | Abcf1                                 | Atp2b4                                |                                    | Gnai2                              |
| Copg                                  |                                      | Abhd11                                | B230312A22Rik                         |                                    | H13                                |
| Cops8                                 |                                      | Acads                                 | Bbs7                                  |                                    | H2afy                              |
| Cox7a2l                               |                                      | Acbd6                                 | Bcl2l1                                |                                    | Lman2                              |
| Crip1                                 |                                      | Acp5                                  | Blvrb                                 |                                    | Ly6e                               |
| Csk                                   |                                      | Acsl5                                 | Btg2                                  |                                    | Mrpl38                             |
| Cstf2                                 |                                      | Acss1                                 | C330018D20Rik                         |                                    | Mrps2                              |
| Cuedc2                                |                                      | Actg1                                 | Cadm3                                 |                                    | Myh9                               |
| Cul4b                                 |                                      | Actl6a                                | Car2                                  |                                    | Phpt1                              |
| Cyba                                  |                                      | Add3                                  | Cat                                   |                                    | Pkn1                               |
| D10Jhu81e                             |                                      | Adk                                   | Cchcr1                                |                                    | Polr2a                             |

|             |               |               |         |
|-------------|---------------|---------------|---------|
| D19Bwg1357e | Adpgk         | Ccndbp1       | Polr3e  |
| Dbnl        | Adprhl2       | Ccrl2         | Ppih    |
| Dctn2       | Aggf1         | Cd24a         | Ppp1r9b |
| Dctn6       | Agpat5        | Cd59a         | Ppp2r5d |
| Ddx23       | Aifm1         | Cd82          | Psma3   |
| Ddx49       | Ak3           | Cdc25b        | Ranbp3  |
| Dera        | Aldh18a1      | Cdkl1         | Rbm19   |
| Dpm3        | Aldh9a1       | Cenpf         | Rcc2    |
| Ebna1bp2    | Alg8          | Cep76         | Rpl3    |
| Ech1        | Ampd2         | Chac2         | Rpl6    |
| Eef1a1      | Ankrd13a      | Clk3          | Rpn1    |
| Eef2        | Anp32a        | Cln8          | Rpp21   |
| Efha1       | Ap1b1         | Cpeb4         | Sept9   |
| Egfl7       | Ap1s1         | Crat          | Sfrs3   |
| Ei24        | Ap3s1         | Ctsf          | Sh3bp1  |
| Eif4b       | Apbb1ip       | D14Ert436e    | Slc19a1 |
| Eif4g1      | Apoa1bp       | D18Ert653e    | Slc38a1 |
| Elp3        | Aqp1          | D930015E06Rik | Smyd2   |
| Eno1        | Arf6          | Dapk2         | Snrpa   |
| Etfb        | Arhgef1       | Ddhd1         | Ssbp4   |
| Exosc2      | Arid1a        | Ddx26b        | Ssr2    |
| Fbl         | Arl5a         | Dennd1a       | Tgfb1   |
| Fbxl6       | Arpc1b        | Dnajb13       | Timm44  |
| Fpgs        | Arpp19        | Dnajb3        | Trim27  |
| Gfm1        | Ash2l         | Dnajb4        | Txlna   |
| Grb10       | Asns          | Dnajc4        | Wdr46   |
| Gsto1       | Asnsd1        | Dtnb          | Wdr6    |
| Gtf2f2      | Atad1         | Dusp8         | Ywhag   |
| Gtf3a       | Atad3a        | Dyrk3         |         |
| H1f0        | Atic          | E130309D14Rik |         |
| H2-K1       | Atp1b2        | E2f2          |         |
| H2-Ke2      | Atp5j         | Eif2ak1       |         |
| Hars        | Atp5o         | Eif5a2        |         |
| Hira        | Atp6v0e       | Epb41         |         |
| Hk1         | Atp6v1h       | Epb49         |         |
| Hmgcl       | Aven          | Evi5          |         |
| Iars        | B230208H17Rik | Ezh1          |         |
| Idh2        | BC005624      | Fbxl3         |         |
| Ifngr1      | BC048355      | Fbxo34        |         |
| Ilf3        | Bak1          | Fcho2         |         |
| Ipo11       | Bat2d         | Fech          |         |
| Isg20l2     | Baz1a         | Fn3k          |         |
| Isoc2a      | Bcap31        | Frmd4a        |         |
| Jagn1       | Bcat2         | Fryl          |         |
| Klhdc3      | Blmh          | Ftl1          |         |
| Krtcap2     | Brd2          | Fzd5          |         |
| Ldha        | Brms1         | Fzr1          |         |
| Lmo4        | Brp16         | Gabarapl2     |         |
| Lonp1       | Bscl2         | Gadd45a       |         |
| Lrrc59      | Bysl          | Gclm          |         |
| Lypla2      | Bzw1          | Gcnt1         |         |
| Magoh       | C030046l01Rik | Gfap          |         |
| Mcm2        | C80913        | Ghitm         |         |
| Mdh1        | Calr          | Gpr150        |         |

|          |            |           |
|----------|------------|-----------|
| Mknk2    | Cand1      | Grap2     |
| Mns1     | Capza1     | Grina     |
| Mpp6     | Ccdc101    | Gtpbbp2   |
| Mrpl15   | Ccdc106    | Gypa      |
| Mrpl27   | Ccdc115    | H2-T23    |
| Mrpl3    | Ccdc56     | H3f3a     |
| Mrpl54   | Ccdc86     | Hace1     |
| Mrps14   | Ccne1      | Hagh      |
| Mta1     | Ccng1      | Hba1      |
| Nat10    | Ccnh       | Hbb       |
| Ncl      | Cct4       | Hdac11    |
| Ncoa5    | Cd3eap     | Hemgn     |
| Ndufb10  | Cd63       | Herc1     |
| Ngp      | Cdc20      | Hist1h2ab |
| Noic1    | Cdc26      | Hist1h2ac |
| Npepl1   | Cdk9       | Hist1h2af |
| Nudt16l1 | Cdt1       | Hist1h2bf |
| Nudt21   | Cetn3      | Hist1h2bj |
| Nudt3    | Cfdp1      | Hist1h4m  |
| Nvl      | Cfl1       | Hmbs      |
| Otud4    | Chaf1a     | Hspbap1   |
| Pbx2     | Chchd1     | lbtk      |
| Pebp1    | Chchd2     | Icam4     |
| Pepl1    | Chchd4     | Igf2      |
| Pfdn5    | Churc1     | Ikbkg     |
| Pfkl     | Cirh1a     | Josd2     |
| Pkm2     | Clns1a     | Kctd9     |
| Pold1    | Clpp       | Klf3      |
| Pold2    | Cmtm7      | Kihl7     |
| Pole2    | Cnbp       | Loxl2     |
| Ppil3    | Cnih       | Lpin2     |
| Ppp1cc   | Cnn2       | Mafg      |
| Ppp2ca   | Cnot10     | Mafk      |
| Pprc1    | Copa       | Map3k7ip3 |
| Prkcsh   | Copb1      | Map4k5    |
| Prmt3    | Cops4      | Mapk8ip3  |
| Prpsap1  | Cops6      | Mar2      |
| Psmb5    | Coro1a     | Mare      |
| Psmc2    | Cox8a      | Med12     |
| Psmc4    | Cs         | Mgst3     |
| Ptbp1    | Cst3       | Mki67     |
| Ptma     | Cstb       | Mmel1     |
| Ptpn6    | Cstf1      | Mpp1      |
| Pwp1     | Ctsz       | Mppe1     |
| Rbm28    | Cul1       | Mpst      |
| Riok2    | Cuta       | Mst1      |
| Rnf187   | Cxxc1      | Mt1       |
| Rnpep    | Cyb5b      | Mxd1      |
| Rpl37a   | Cyc1       | Mxd3      |
| Rpp14    | D10Wsu52e  | Myo1d     |
| Rps25    | D17Wsu104e | Naprt1    |
| Rps27a   | Dalrd3     | Nbr1      |
| Rps8     | Daxx       | Ncoa7     |
| Scarb1   | Dbi        | Nfe2      |

|          |          |          |
|----------|----------|----------|
| Sfrs4    | Dcps     | Nqo1     |
| Sfrs9    | Dctn5    | Nt5c3    |
| Shmt2    | Ddx1     | Nusap1   |
| Slc25a5  | Ddx24    | Otub2    |
| Slc29a1  | Ddx27    | Paqr3    |
| Smarca4  | Ddx39    | Parp16   |
| Smarcd2  | Ddx46    | Pcmtd2   |
| Smchd1   | Ddx54    | Pdzk1ip1 |
| Smu1     | Deb1     | Pepd     |
| Snrpa1   | Dhcr24   | Phospho1 |
| Snrpb2   | Dis3     | Pigq     |
| Snrpf    | Dlst     | Pim1     |
| Srp9     | Dnaja2   | Pip5k1a  |
| Tagln2   | Dnajc15  | Pir      |
| Tbcb     | Dph5     | Pkhd111  |
| Tbl1x    | Dtd1     | Pld3     |
| Thbs1    | Dtymk    | Plek2    |
| Timm8a1  | Dynll2   | Pnpla8   |
| Tk1      | E2f6     | Pnpo     |
| Tmem147  | Ecd      | Popdc2   |
| Tmem70   | Ecsit    | Prdx2    |
| Tomm7    | Eef1g    | Prnp     |
| Tpm4     | Efhd2    | Prokr1   |
| Tpr      | Eif1b    | Rab3il1  |
| Tpst2    | Eif2b4   | Rad23a   |
| Trappc4  | Eif2b5   | Ranbp10  |
| Trappc6a | Eif2s1   | Rbm38    |
| Trim28   | Eif2s3x  | Rhd      |
| Tspan3   | Eif4e    | Rnf123   |
| Tsta3    | Eif4ebp2 | Runx1t1  |
| Txn2     | Eif4h    | Sec23a   |
| Txndc5   | Eif5a    | Senp7    |
| Ube2d2   | Elac2    | Sertad2  |
| Ube2n    | Elavl1   | Sh3yl1   |
| Vars     | Elof1    | Shb      |
| Vasp     | Emd      | Slc16a10 |
| Vim      | Emp3     | Slc1a5   |
| Ybx1     | Eprs     | Slc22a4  |
| Zfp330   | Ergic1   | Slc25a37 |
| Zyx      | Erh      | Slc25a39 |
|          | Ero1l    | Slc2a1   |
|          | Esf1     | Slc43a1  |
|          | Exoc6    | Slc4a1   |
|          | Exosc3   | Slc6a9   |
|          | Exosc5   | Smox     |
|          | Exosc6   | Snca     |
|          | Exosc7   | Snx22    |
|          | Ext2     | Sorbs1   |
|          | Ezh2     | Sox6     |
|          | Fbxl14   | Spata13  |
|          | Fcf1     | Sptb     |
|          | Fem1b    | Spsb3    |
|          | Fen1     | Srxn1    |
|          | Fkbp1a   | Ssh1     |

|           |          |
|-----------|----------|
| Fkbp4     | St3gal5  |
| Fnta      | Stk3     |
| Ftl1      | Synj1    |
| Fto       | Syt14    |
| Ftsj3     | Tac2     |
| Galk1     | Tax1bp1  |
| Gart      | Tbcel    |
| Gcsh      | Tcf19    |
| Gemin5    | Tcp11l2  |
| Gga1      | Tfdp2    |
| Glt25d1   | Timd2    |
| Gltscr2   | Tmcc2    |
| Gmps      | Tmco6    |
| Gna12     | Trim10   |
| Gng10     | Trim56   |
| Golt1b    | Trim58   |
| Got1      | Trp53bp1 |
| Got2      | Tspan33  |
| Gpaa1     | Txnrd2   |
| Gpr56     | Ubap1    |
| Gpr89     | Ube2c    |
| Gtf2i     | Ube2e3   |
| Gusb      | Ube2h    |
| Gyg       | Ube2l6   |
| Hadh      | Ube2o    |
| Hax1      | Ucp2     |
| Hba1      | Ulk1     |
| Hbb       | Unc5cl   |
| Hdac1     | Unkl     |
| Hdac2     | Urod     |
| Hdac3     | Vangl1   |
| Hdgfrp2   | Wbp1     |
| Heatr3    | Wbp2     |
| Hells     | Wdr26    |
| Hiatl1    | Xpa      |
| Hibadh    | Xpo7     |
| Hint1     | Yipf4    |
| Hmga1     | Yod1     |
| Hmga1-rs1 | Ypel3    |
| Hmgb3     | Ypel4    |
| Hmha1     | Zdhhc14  |
| Hnrp1l    | Zfp341   |
| Hsbp1     |          |
| Hsd17b4   |          |
| Hsf1      |          |
| Hspa14    |          |
| Hspa4     |          |
| Hspa9     |          |
| Htatsf1   |          |
| Huwe1     |          |
| Ide       |          |
| Idh3b     |          |
| Igfbp4    |          |
| Ikzf1     |          |



If2  
Ikap  
Imp4  
Inpp5d  
Ints10  
Ipo7  
Isyna1  
Itm2b  
Kars  
Kctd10  
Kdelr2  
Khdrbs1  
Khsrp  
Khl23  
Kpna2  
Lars  
Lcp1  
Ldb1  
Leo1  
Lgals1  
Lig1  
Lman1  
Lmnb1  
Lrp10  
Lrpprc  
Lsg1  
Lsm12  
Lsm2  
Lsm5  
Lsm6  
Ltv1  
Lyar  
Mapre2  
Mars  
Mbd3  
Mcm10  
Mcm3  
Mcm4  
Mcm5  
Mcm7  
Mdh2  
Med4  
Med8  
Metap1  
Mettl2  
Mif  
Minpp1  
Mki67ip  
Morf4l2  
Mphosph10  
Mrpl11  
Mrpl13  
Mrpl14  
Mrpl28

Mrpl33  
Mrpl34  
Mrpl37  
Mrpl49  
Mrps10  
Mrps17  
Mrps24  
Mrps27  
Mrps28  
Mrps30  
Mrps9  
Msh2  
Msn  
Mtap  
Mthfd11  
Mtx1  
Myb  
Myc  
Myeov2  
Myl6  
Nans  
Nap111  
Nap114  
Narg1  
Nasp  
Ncln  
Ndufa10  
Ndufa12  
Ndufa4  
Ndufa5  
Ndufab1  
Ndufb3  
Ndufs2  
Ndufs8  
Nedd8  
Nfu1  
Ngdn  
Nhp211  
Nmd3  
Nme2  
Nme4  
Nme6  
Nmt1  
Noc3l  
Nol10  
Nol6  
Nol9  
Nrgn  
Nsd1  
Nsmce4a  
Nt5c  
Nt5c2  
Nt5dc2  
Nubp2

Nudcd1  
Nudcd2  
Nudt1  
Nup160  
Nup188  
Nup205  
Nup37  
Nup85  
Nup93  
Nxt1  
Oat  
Obfc2b  
Orc3l  
Orc5l  
Oxa1l  
Oxct1  
Pa2g4  
Pabpn1  
Paf1  
Park7  
Parn  
Parp1  
Parp2  
Pdcd11  
Pdcd2  
Pdia4  
Pdk1  
Pfas  
Pfdn1  
Pfkml  
Pfn1  
Pgd  
Pgl1  
Phb  
Phf10  
Pitpna  
Pitpnb  
Pmpcb  
Pno1  
Podxl  
Poldip3  
Polr2e  
Polr2f  
Polr2h  
Pom121  
Por  
Ppan  
Ppat  
Ppia  
Ppie  
Ppil1  
Ppp1ca  
Ppp1r7  
Ppp2r2a

Ppp3r1  
Ppp5c  
Prcc  
Prdx6  
Preb  
Prep  
Prim2  
Prkar1a  
Prkrii  
Prmt1  
Prpf38a  
Prpf6  
Prps2  
Prtn3  
Psap  
Psat1  
Psd4  
Psen2  
Psm1  
Psm2  
Psm4  
Psm5  
Psmb3  
Psmb4  
Psmb7  
Psmc5  
Psm12  
Psm13  
Psm1  
Psm2  
Ptcd3  
Ptges3  
Ptov1  
Ptplad1  
Ptpn11  
Ptpn7  
Pus1  
Pycr2  
Pycl  
Qars  
Qdpr  
Rab7  
Rac2  
Rad23b  
Rad51  
Rae1  
Rap1gds1  
Rapgef1  
Raver1  
Rbck1  
Rcc1  
Rcl1  
Rexo2  
Rfc2

Rfc5  
Rgs10  
Rnasen  
Rnf126  
Rnf130  
Rpia  
Rpl10a  
Rpl13a  
Rpl15  
Rpl19  
Rpl24  
Rpl27  
Rpl29  
Rpl32  
Rpl35  
Rpl4  
Rpl7  
Rplp1  
Rplp2  
Rpp30  
Rps11  
Rps14  
Rps16  
Rps18  
Rps19bp1  
Rps23  
Rps24  
Rps26  
Rps28  
Rps3  
Rps4x  
Rps9  
Rqcd1  
Rrm1  
Rrn3  
Rrp15  
Rrp9  
Rrs1  
Rsl1d1  
Rtcd1  
Ruvbl1  
Ruvbl2  
Sae1  
Samm50  
Sap18  
Sar1a  
Sar1b  
Sars  
Sat1  
Scamp3  
Scap  
Scd2  
Sdha  
Sdhb

Sdhc  
Sec11a  
Sec11c  
Sec13  
Sec24c  
Sec61a1  
Serbp1  
Set  
Setdb1  
Sf1  
Sf3a1  
Sf3b2  
Sf3b3  
Sfpi1  
Sfxn1  
Sgta  
Sh3bgrl3  
Siva1  
Slc16a3  
Slc25a11  
Slc25a13  
Slc25a17  
Slc25a3  
Slc35c2  
Slc39a8  
Slc4a1  
Slc7a1  
Smad2  
Smarca5  
Snap23  
Snrpb  
Snrpc  
Snrpd1  
Snrpd2  
Snrpe  
Snrpg  
Snw1  
Snx17  
Snx6  
Sord  
Spag7  
Spcs2  
Sra1  
Srm  
Srp72  
Srpk1  
Ssb  
Ssr1  
St3gal6  
Stmn1  
Stra13  
Stt3a  
Stxbp2  
Sucla2

Suc1g1  
Sumo1  
Surf1  
Surf2  
Surf6  
Syce2  
Sympk  
Syncrip  
Taf10  
Taf12  
Tars  
Tars2  
Tarsl2  
Tbca  
Tbl3  
Tbrg4  
Tcerg1  
Tcf25  
Tcof1  
Tex10  
Tfdp1  
Thg1l  
Thoc3  
Thoc4  
Thoc5  
Thoc7  
Thop1  
Thra  
Tigd3  
Timm23  
Timm50  
Timm9  
Tipin  
Tmbim4  
Tmed10  
Tmed2  
Tmed9  
Tnpo1  
Tnpo3  
Tomm40  
Tomm70a  
Top2b  
Tpi1  
Tra2a  
Trappc3  
Trmt1  
Trp53  
Tspan31  
Tsr1  
Ttc27  
Till12  
Tuba1a  
Tubb5  
Tut1

Txnrd1  
Tysnd1  
Ubap2  
Ubap2l  
Ube2e1  
Ube2g2  
Ube2i  
Ube2m  
Ube2q2  
Ubqln4  
Ubf  
Uchl3  
Uchl5  
Ufc1  
Ugcg  
Umps  
Unc119  
Ung  
Uqcr  
Uqcrb  
Uqcrc1  
Usmg5  
Usp1  
Usp10  
Usp39  
Usp5  
Utp14a  
Vac14  
Vamp5  
Vdac1  
Vps25  
Vps4b  
Vps72  
Wdr1  
Wdr12  
Wdr18  
Wdr4  
Wdr5  
Wdr61  
Wdr74  
Wdr75  
Wibg  
Xpo1  
Yars2  
Yeats4  
Yif1b  
Ythdf1  
Ythdf2  
Zc3h14  
Zfp36l2  
Zmiz2  
Zmpste24  
Zmynd19  
Znrd1



I7Rn6  
rp9

Figure S1

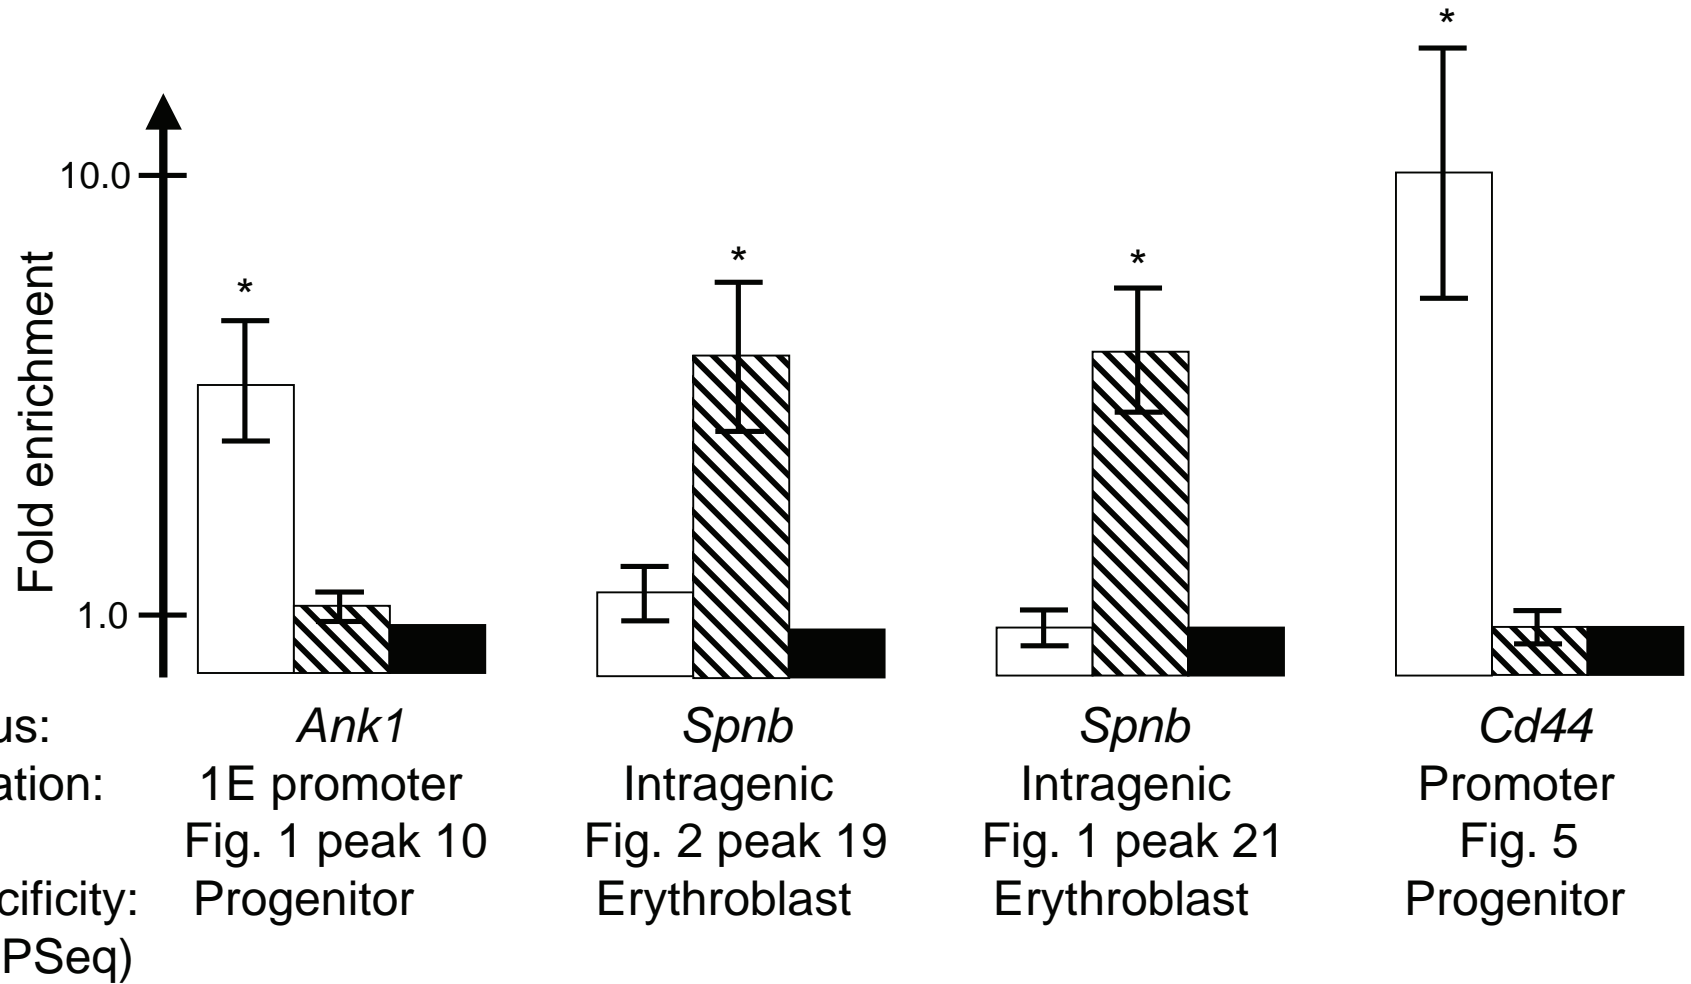

**Figure S1.** ChIP analysis of cell type specific EKLf occupancy. Chromatin was isolated from sorted day 13.5 HA-*Klf1* fetal liver progenitor cells (white bars) and Erythroblasts (hatched bars), and enriched with an anti-HA antibody. The enriched chromatin from each cell type was amplified along with unfractionated input chromatin (black bars) using the primers listed in Table S1. Significant enrichment in either progenitor cell or erythroblast chromatin was observed at all 4 locations (\*  $p < 0.01$ ).

**Figure S2**

**A**

EKLF Peaks in Tallack *et al.*: 945

EKLF Peaks: 15493

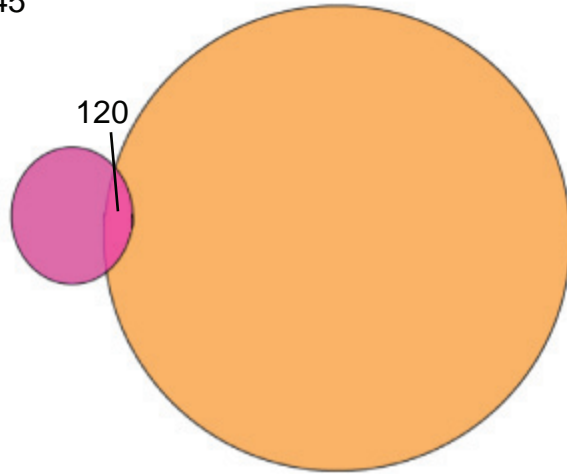

**B**

EKLF Peaks Jointly occupied by GATA1 in Erythroblasts in Tallack *et al.*: 454 Peaks

EKLF Peaks Jointly occupied by GATA1 in Erythroblasts: 2153 Peaks

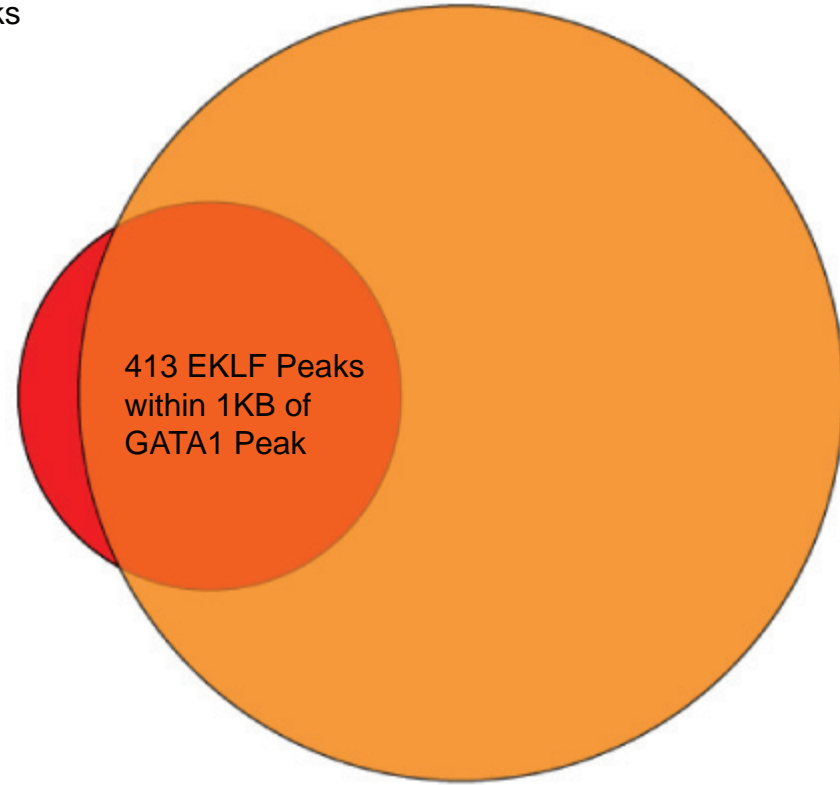

**C**

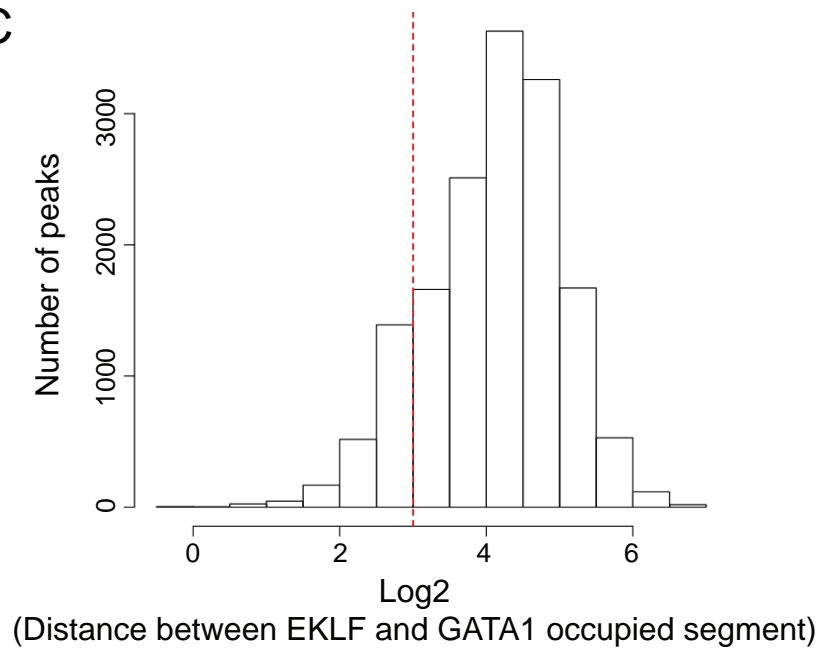

**Figure S2.** Comparison of EKLf occupancy. (A) Tallack et al. identified 945 EKLf peaks (pink) while this study identified over 15,000 EKLf peaks (orange), of which 120 were identical in both data sets. (B) Tallack et al. identified 454 EKLf peaks within 1 kb of a GATA1 occupied site. A similar analysis of our data identified over 2000 such peaks, of which 415 overlapped with the peaks identified by Tallack et al. (C) While the number of EKLf peaks associated with GATA1 peaks was 48% of the peaks identified by Tallack et al., EKLf peaks within 1 kb of a GATA1 occupied site (left of the red vertical line) were only 14% of the peaks identified in our study.
